# Supplementary material
Source: publisher figshare collection journal article supplement (https://rs.figshare.com/ndownloader/files/15069890)
Supplement: Supplementary file 1 [file 15069890]

Titles and captions of Electronic Supplementary Materials (ESM)

Title: Appendix S1. Exploration of other predictor variables on parasite ecoregion area

Title: Fig. S1. GAM outputs that quantify the effects of each of three related host variables on parasite ecoregion area

Title: Appendix S2. Additional details about statistical analyses, further justification for choice of methods, and packages used.

Title: Fig. S2.

Legend/Caption: GAM outputs of the relationship of the ecoregion area occupied by a mammal parasite species as a function of its citation count and number of host species.

Title: Appendix S3. Exploration of an additional way to handle effect of sampling effort using a residual approach

Title: Fig. S3.

Legend/Caption: Bayesian network analysis removing the influence of sampling effort using the residual method to account for citation count

Title: Fig. S4.

Legend/Caption: Box plot of descriptive summary data for each mammal host group in the full dataset.

Title: Fig. S5.

Legend/Caption: Box plot of descriptive summary data for each mammal host group for parasites with more than one host and for which we had complete information including average phylogenetic diversity (n=866).

Title: Table S1. Boosted Regression Tree analyses of parasite ecoregion area.

Title: Table S2. Bayesian network parameters showing intercepts and coefficients of the condition dependencies at each child node.

Title: Bayesian Network Analysis code for R.

Legend/Caption: Byers_et_al_2019.Rmd: an R markdown file containing code use for Bayesian network analyses.

Title: Data for use with Bayesian Network Analysis model

Legend/Caption: Byers_et_al_2019.RData: an R workspace file containing data for use with "Byers_et_al_2019.Rmd."
